# Supplementary material
Source: Springer Nature journal article supplement (https://www.springermedizin.de/resource/supplementary/12885_2013_4547_MOESM4_ESM.pdf/9466652)

CAF

Tumour Cell

CAF

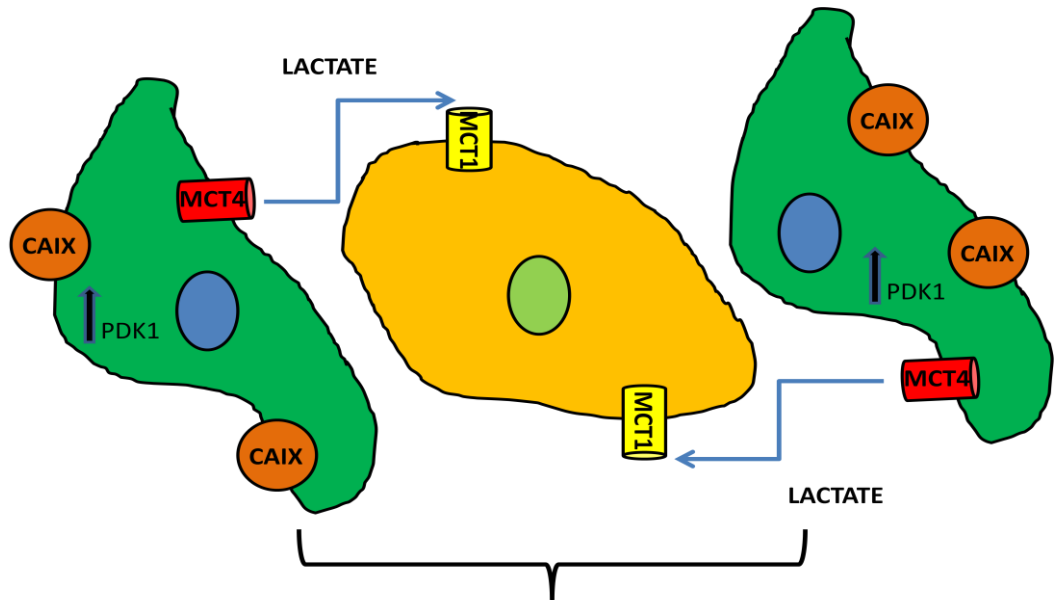

Biochemical Recurrence after surgery  
pT3 stage of the tumour

Supplement: MOESM4 [file 9466652]
